# Supplementary material for: Penultimate glacial sea surface temperature and hydrologic variability in the tropical South Pacific from 150 ka Tahiti corals
Source: Copernicus journal article supplement (doi:10.5194/egusphere-2025-2996), 2025-07-01
Supplement: Supplementary file 1 [file egusphere-2025-2996-supplement.pdf]

**Table S1** Results of X-ray diffraction (XRD) analysis and scanning electron microscopy (SEM) observation on fossil corals. Subsamples with numbers are investigated for diagenesis screening, which correspond to skeletal portions with numbers in Figs. 3 and S1.

| Sample ID                      | Subsample for diagenesis test* | XRD           |             | SEM                          |
|--------------------------------|--------------------------------|---------------|-------------|------------------------------|
|                                |                                | Aragonite (%) | Calcite (%) | Secondary aragonite cement   |
| Exp.310-9B-17R-1<br>(44-53 cm) | ①                              | 100.0         | 0.0         | none                         |
|                                | ②                              | 100.0         | 0.0         | <i>partially distributed</i> |
|                                | ③                              | 89.6          | 10.4        | -                            |
|                                | ④                              | 80.5          | 19.5        | -                            |
|                                | ⑤                              | 71.3          | 28.7        | -                            |
| Exp.310-9D-25R-1<br>(65-75 cm) | ①                              | 100.0         | 0.0         | none                         |
|                                | ②                              | 100.0         | 0.0         | none                         |
|                                | ③                              | 100.0         | 0.0         | none                         |
|                                | ④                              | 100.0         | 0.0         | none                         |
|                                | ⑤                              | 100.0         | 0.0         | none                         |
|                                | ⑥                              | 100.0         | 0.0         | none                         |
|                                | ⑦                              | 100.0         | 0.0         | none                         |
|                                | ⑧                              | 100.0         | 0.0         | none                         |
|                                | ⑨                              | 95.3          | 4.7         | <i>partially distributed</i> |
| Exp.310-9D-25R-2<br>(43-51 cm) | ①                              | 100.0         | 0.0         | none                         |
|                                | ②                              | 100.0         | 0.0         | none                         |
|                                | ③                              | 100.0         | 0.0         | none                         |
| Exp.310-9D-25R-2<br>(51-57 cm) | ①                              | 100.0         | 0.0         | none                         |
|                                | ②                              | 100.0         | 0.0         | none                         |
|                                | ③                              | 100.0         | 0.0         | none                         |
|                                | ④                              | 100.0         | 0.0         | none                         |
|                                | ⑤                              | 100.0         | 0.0         | <i>partially distributed</i> |

\*The subsample number corresponds to that in Figure DR2.

9B17R1\_44-53cm

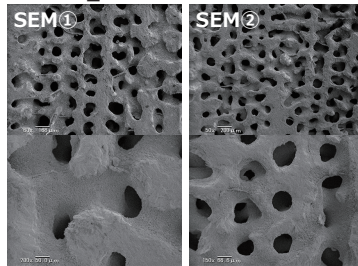

9D25R1\_65-75cm

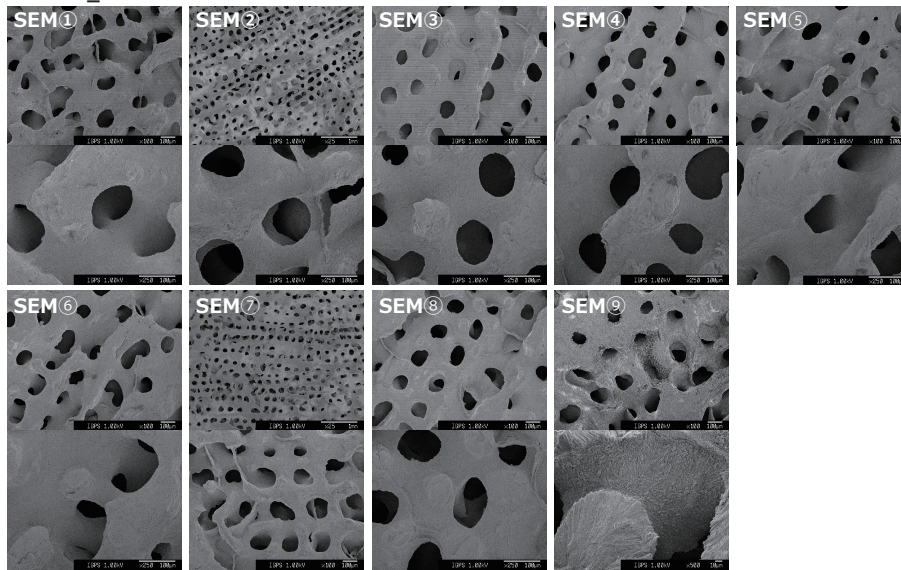

9D25R2\_43-51cm

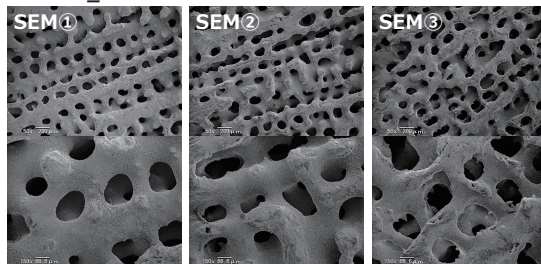

9D25R2\_51-57cm

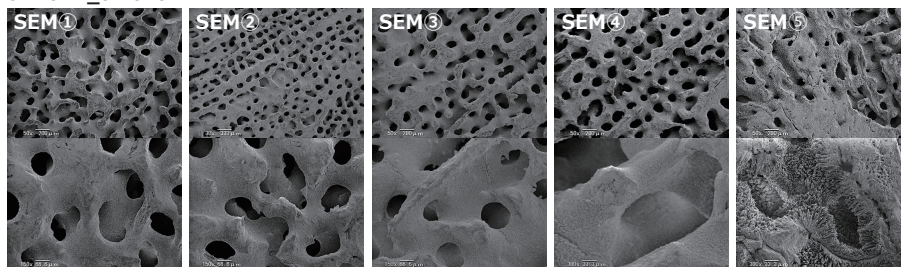

**Figure S1.** SEM images of coral skeleton from sample 310-9B-17R-1, 310-9D-25R-1, and 310-9D-25R-2. Numbers correspond to those of skeletal portions shown in Fig. 3.
